# Supplementary material
Source: publisher figshare collection journal article supplement (https://gsajournals.figshare.com/ndownloader/files/24814958)
Supplement: Supplementary file 1 [file 24814958]

Table S1- *Candida albicans* strains used in this study.

| **Strain** | **Genotype** | **Reference** |
| --- | --- | --- |
| SC5314 | *C. albicans* wild-type | Gillum *et al.* 1984 |
| SN148a | *MATa/a arg4/arg4 leu2/leu2 his1/his1 ura3::imm434/ura3::imm434 iro1::imm434/iro1::imm434* | Renjie Tang |
| 3315α | *MATalpha/alpha trp1/trp1; lys2/lys2* | P. T. Magee |
| 3745a | *MATa/a trp1/trp1; lys2/lys2* | Panwar *et al.* 2003 |
| *cag1Δ/Δ* | *cag1::ARG4/cag1::ARG4 leu2/leu2 his1/his1 ura3::imm434/ura3::imm434 iro1::imm434/iro1::imm434* | This study |
| *ste2Δ/Δ* | *ste2::ARG4/ste2::ARG4 leu2/leu2 his1/his1 ura3::imm434/ura3::imm434 iro1::imm434/iro1::imm434* | This study |
| *ste4Δ/Δ* | *ste4::ARG4/ste4::ARG4 leu2/leu2 his1/his1 ura3::imm434/ura3::imm434 iro1::imm434/iro1::imm434* | This study |
| *ste11Δ/Δ* | *ste11::ARG4/ste11::ARG4 leu2/leu2 his1/his1 ura3::imm434/ura3::imm434 iro1::imm434/iro1::imm434* | This study |
| *hst7Δ/Δ* | *hst7::ARG4/hst7::ARG4 leu2/leu2 his1/his1 ura3::imm434/ura3::imm434 iro1::imm434/iro1::imm434* | This study |
| *CST5-CAAX/CST5-CAAX* | *CST5-CAAX::HIS1/CST5-CAAX::HIS1 arg4/arg4 leu2/leu2 ura3::imm434/ura3::imm434 iro1::imm434/iro1::imm434* | This study |
| *CST5-CAAX/CST5-CAAX cag1Δ/Δ* | *cag1::ARG4/cag1::ARG4 CST5-CAAX::HIS1/CST5-CAAX::HIS1 leu2/leu2 ura3::imm434/ura3::imm434 iro1::imm434/iro1::imm434* | This study |
| *CST5-CAAX/CST5-CAAX ste2Δ/Δ* | *ste2::ARG4/ste2::ARG4 CST5-CAAX::HIS1/CST5-CAAX::HIS1 leu2/leu2 ura3::imm434/ura3::imm434 iro1::imm434/iro1::imm434* | This study |
| *CST5-CAAX/CST5-CAAX ste4Δ/Δ* | *ste4::ARG4/ste4::ARG4 CST5-CAAX::HIS1/CST5-CAAX::HIS1 leu2/leu2 ura3::imm434/ura3::imm434 iro1::imm434/iro1::imm434* | This study |
| *CST5-CAAX/CST5-CAAX ste11Δ/Δ* | *ste11::ARG4/ste11::ARG4 CST5-CAAX::HIS1/CST5-CAAX::HIS1 leu2/leu2 ura3::imm434/ura3::imm434 iro1::imm434/iro1::imm434* | This study |
| *CST5-CAAX/CST5-CAAX hst7Δ/Δ* | *hst7::ARG4/hst7::ARG4 CST5-CAAX::HIS1/CST5-CAAX::HIS1 leu2/leu2 ura3::imm434/ura3::imm434 iro1::imm434/iro1::imm434* | This study |
| *CST5-GFP/CST5-GFP* | *CST5-GFP::HIS1/CST5-GFP::HIS1 arg4/arg4 leu2/leu2 ura3::imm434/ura3::imm434 iro1::imm434/iro1::imm434* | This study |
| *CST5-GFP/CST5-GFP cag1Δ/Δ* | *cag1::ARG4/cag1::ARG4 CST5-GFP::HIS1/CST5-GFP::HIS1 leu2/leu2 ura3::imm434/ura3::imm434 iro1::imm434/iro1::imm434* | This study |
| *CST5-GFP/CST5-GFP ste2Δ/Δ* | *ste2::ARG4/ste2::ARG4 CST5-GFP::HIS1/CST5-GFP::HIS1 leu2/leu2 ura3::imm434/ura3::imm434 iro1::imm434/iro1::imm434* | This study |
| *CST5-GFP/CST5-GFP ste4Δ/Δ* | *ste4::ARG4/ste4::ARG4 CST5-GFP::HIS1/CST5-GFP::HIS1 leu2/leu2 ura3::imm434/ura3::imm434 iro1::imm434/iro1::imm434* | This study |
| *CST5-GFP/CST5-GFP ste11Δ/Δ* | *ste11::ARG4/ste11::ARG4 CST5-GFP::HIS1/CST5-GFP::HIS1 leu2/leu2 ura3::imm434/ura3::imm434 iro1::imm434/iro1::imm434* | This study |
| *CST5-GFP/CST5-GFP hst7Δ/Δ* | *hst7::ARG4/hst7::ARG4 CST5-GFP::HIS1/CST5-GFP::HIS1 leu2/leu2 ura3::imm434/ura3::imm434 iro1::imm434/iro1::imm434* | This study |
| *CST5-GFP/CST5-GFP ste11Δ/Δ cag1Δ/Δ* | *ste11::ARG4/ste11::ARG4 CST5-GFP::HIS1/CST5-GFP::HIS1 cag1::LEU2/cag1::LEU2 ura3::imm434/ura3::imm434 iro1::imm434/iro1::imm434* | This study |
| *CST5-GFP/CST5-GFP ste11Δ/Δ ste4Δ/Δ* | *ste11::ARG4/ste11::ARG4 CST5-GFP::HIS1/CST5-GFP::HIS1 ste4::LEU2/ste4::LEU2 ura3::imm434/ura3::imm434 iro1::imm434/iro1::imm434* | This study |
| *CST5-GFP/CST5-GFP ste11Δ/Δ hst7Δ/Δ* | *ste11::ARG4/ste11::ARG4 CST5-GFP::HIS1/CST5-GFP::HIS1 hst7::LEU2/hst7::LEU2 ura3::imm434/ura3::imm434 iro1::imm434/iro1::imm434* | This study |
| *STE11-CAAX/STE11-CAAX* | *STE11-CAAX::HIS1/STE11-CAAX::HIS1 arg4/arg4 leu2/leu2 ura3::imm434/ura3::imm434 iro1::imm434/iro1::imm434* | This study |
| *STE11-CAAX/STE11-CAAX cst5Δ/Δ* | *cst5::ARG4/cst5::ARG4 STE11-CAAX::HIS1/STE11-CAAX::HIS1 leu2/leu2 ura3::imm434/ura3::imm434 iro1::imm434/iro1::imm434* | This study |
| *CEK1-GFP/CEK1-GFP* | *CEK1-GFP::HIS1/CEK1-GFP::HIS1 arg4/arg4 leu2/leu2 ura3::imm434/ura3::imm434 iro1::imm434/iro1::imm434* | This study |
| *CEK1-GFP/CEK1-GFP ste11Δ/Δ* | *ste11::ARG4/ste11::ARG4 CEK1-GFP::HIS1/CEK1-GFP::HIS1 leu2/leu2 ura3::imm434/ura3::imm434 iro1::imm434/iro1::imm434* | This study |
| *CEK1-GFP/CEK1-GFP hst7Δ/Δ* | *hst7::ARG4/hst7::ARG4 CEK2-GFP::HIS1/CEK2-GFP::HIS1 leu2/leu2 ura3::imm434/ura3::imm434 iro1::imm434/iro1::imm434* | This study |
| *CEK2-GFP/CEK2-GFP* | *CEK2-GFP-URA3::imm434/CEK2-GFP-URA3::imm434* | Rastghalam *et al.* 2019 |
| *cek2Δ/Δ* | *ura3/ura3 cek2::TAA (32nd and 37th amino acids)/cek2::TAA (32nd and 37th amino acids)* | Rastghalam *et al.* 2019 |
| *CEK2-GFP/CEK2-GFP ste11Δ/Δ* | *ste11::ARG4/ste11::ARG4 CEK2-GFP::HIS1/CEK2-GFP::HIS1 leu2/leu2 ura3::imm434/ura3::imm434 iro1::imm434/iro1::imm434* | This study |

**Literature cited**

Gillum, A. M., E. Y. Tsay, and D. R. Kirsch, 1984 Isolation of the *Candida albicans* gene for orotidine-5’-phosphate decarboxylase by complementation of *S. cerevisiae* ura3 and E. coli pyrF mutations. Mol. Gen. Genet. 198: 179–182.

Panwar, S. L., M. Legrand, D. Dignard, M. Whiteway, and P. T. Magee, 2003 MFalpha1, the gene encoding the alpha mating pheromone of *Candida albicans*. Eukaryot. Cell 2: 1350–1360.

Rastghalam, G., R. P. Omran, M. Alizadeh, D. Fulton, J. Mallick *et al.*, 2019 MAP Kinase Regulation of the *Candida albicans* Pheromone Pathway. mSphere 4: e00598-18.
